# Supplementary material for: Recyclable dye-sensitized TiO 2 composite membranes with interfacial spectral complementarity for sustainable white-light-driven dye degradation
Source: Royal Society of Chemistry journal article supplement (doi:10.1039/d5ra09829g), 2026-01-01
Supplement: d5ra09829g1.pdf [file d5ra09829g1.pdf]

## **SUPPORTING INFORMATION**

### **Recyclable Dye-Sensitized TiO<sub>2</sub> Composite Membranes with Interfacial Spectral Complementarity for Sustainable White-Light-Driven Dye Degradation**

Hongyang Cen<sup>abd1</sup>, Wei Zhu<sup>abc1</sup>, Yongqiang Li<sup>abcd\*</sup>, Yajing Song<sup>abd</sup>, Zhenxin Xu<sup>abd</sup>,  
Pengjiang Tan<sup>ab</sup>, Shuo Cao<sup>abd</sup>, Yonglei Gao<sup>ab</sup>, Yi Huang<sup>abc</sup>

a State Key Laboratory of Bio-based Fiber Materials, Zhejiang Sci-Tech University, Hangzhou 310018, China

b Engineering Research Center for Eco-Dyeing and Finishing of Textiles, Ministry of Education, Zhejiang Sci-Tech University, Hangzhou 310018, China

c Key Laboratory of Intelligent Textile and Flexible Interconnection of Zhejiang Province, Hangzhou 310018, China

d Tongxiang Research Institute, Zhejiang Sci-Tech University, Tongxiang 314500, China

Corresponding author:

E-mail address: yqqli@163.com (Y. Li).

## Table of contents

|                                                                                                                                                                                                 |   |
|-------------------------------------------------------------------------------------------------------------------------------------------------------------------------------------------------|---|
| <b>Fig. S1.</b> Synthesis of AIE <b>1</b> . Reagents and conditions: a) NH <sub>4</sub> OAc, ACOH, 100 °C, 24 h, 82%.                                                                           |   |
| 3                                                                                                                                                                                               |   |
| <b>Fig. S2.</b> The <sup>1</sup> H-NMR spectrum of RA.                                                                                                                                          | 3 |
| <b>Fig. S3.</b> The <sup>13</sup> C-NMR spectrum of RA.                                                                                                                                         | 4 |
| <b>Fig. S4.</b> Physical images of single-sensitized and co-sensitized TiO <sub>2</sub> .                                                                                                       | 4 |
| <b>Fig.S5.</b> The fiber diameter of PMMA fibers obtained at 24 wt% and 12000 rpm with different Spinning plate aperture (0.3mm, 0.4mm, 0.5mm). Insert: SEM images, Scal bar: 1 μm (a-f), 1 μm. |   |
| 5                                                                                                                                                                                               |   |
| <b>Fig.S6.</b> FT-IR spectra of TiO <sub>2</sub> .                                                                                                                                              | 5 |
| <b>Fig.S7.</b> FL spectra of PMMA fibers sensitized by different dyes with TiO <sub>2</sub> .                                                                                                   | 6 |
| <b>Fig.S8.</b> Self degradation efficiency of Acid Red 359 200% pure dye solution under xenon lamp irradiation                                                                                  | 6 |

### Synthetic procedures of RA

RA: To a stirred solution of 4-formyltriphenylamine (1 eq., 1.10 mmol, 300 mg) and rhodanine 3-acetic acid (1.2 eq., 1.32 mmol, 252 mg) in glacial acetic acid, ammonium acetate (3 eq., 3.30 mmol, 254 mg) was added. The solution was heated to reflux for 24 h. After cooling to room temperature, the mixture was filtered and the residue was washed by ethyl acetate/petroleum ether (v/v 1:3) 3×10 mL, pure water 3×10 mL, and absolute ethyl alcohol 3×10 mL. The residue was dried in vacuum to give RA (402 mg, 82%). <sup>1</sup>H NMR (400 MHz, CDCl<sub>3</sub>) δ 7.70 (s, 1H), 7.34 (t, *J* = 7.9 Hz, 6H), 7.26 (s, 1H), 7.16 (dd, *J* = 7.8, 5.3 Hz, 6H), 7.02 (d, *J* = 8.6 Hz, 2H), 4.92 (s, 2H). HRMS(ESI): *m/z* [M+1]<sup>+</sup> calcd for C<sub>24</sub>H<sub>18</sub>N<sub>2</sub>O<sub>3</sub>S<sub>2</sub>: 447.5390; found 447.0824.

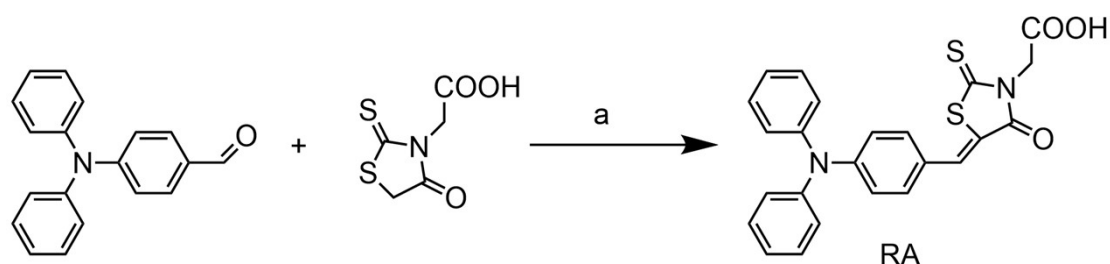

**Fig. S1.** Synthesis of AIE **1**. Reagents and conditions: a) NH<sub>4</sub>OAc, ACOH, 100 °C, 24 h, 82%.

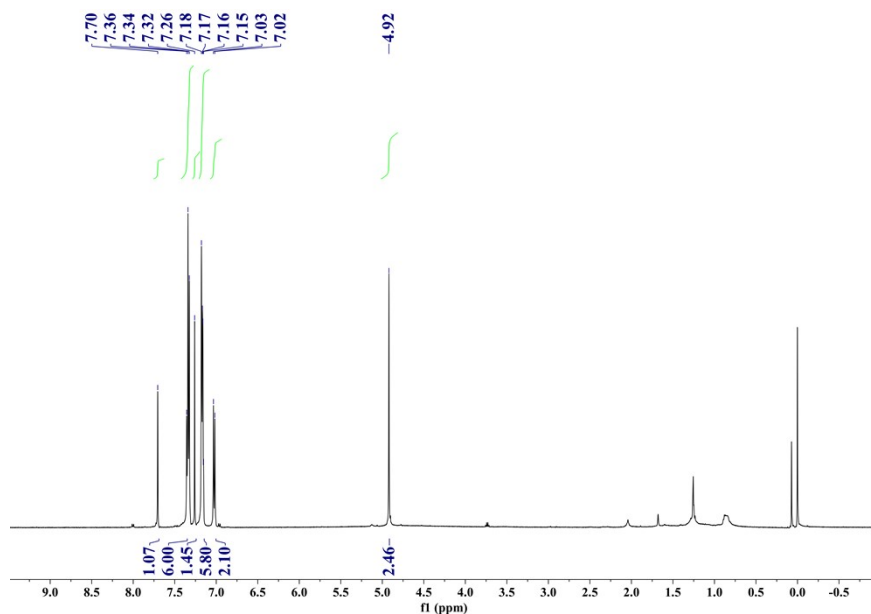

**Fig. S2.** The <sup>1</sup>H-NMR spectrum of RA.

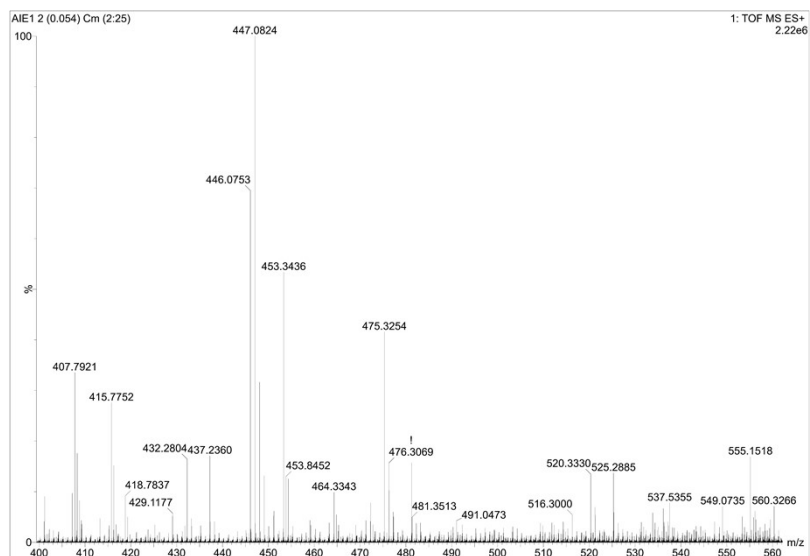

**Fig. S3.** The  $^{13}\text{C}$ -NMR spectrum of RA.

**RA-TiO<sub>2</sub> CS-TiO<sub>2</sub> N719-TiO<sub>2</sub>**

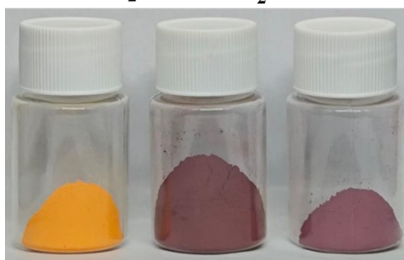

**Fig. S4.** Physical images of single-sensitized and co-sensitized TiO<sub>2</sub>.

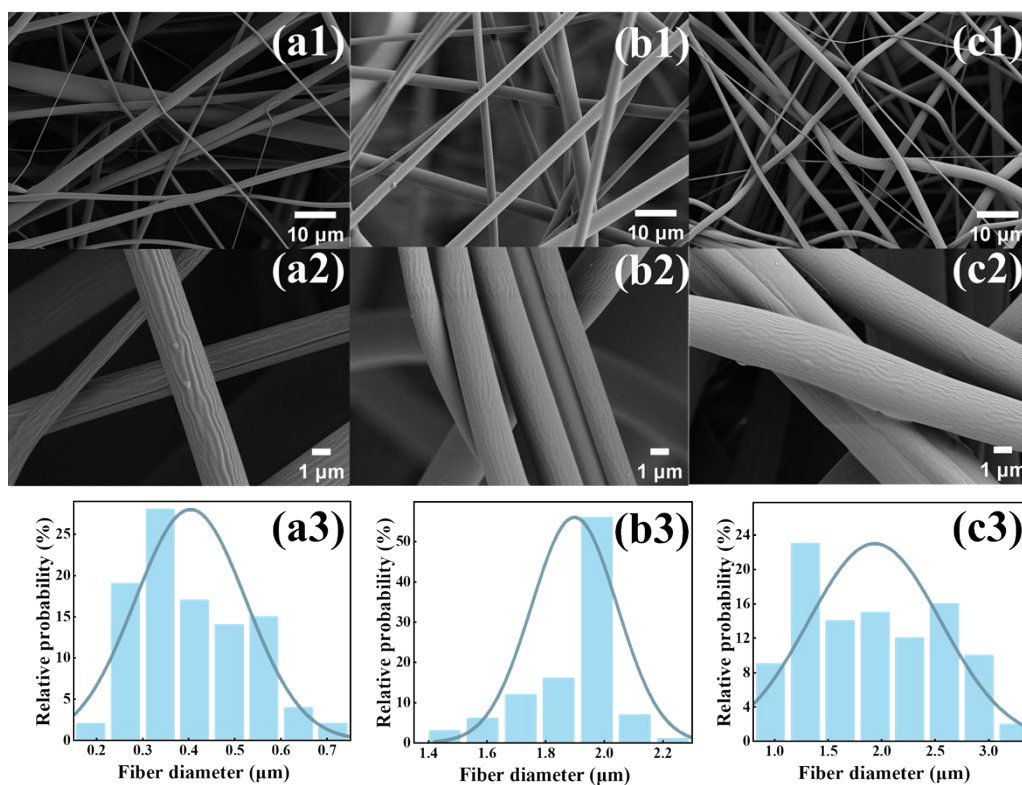

**Fig.S5.** The fiber diameter of PMMA fibers obtained at 24 wt% and 12000 rpm with different Spinning plate aperture (0.3mm, 0.4mm, 0.5mm). Insert: SEM images, Scal bar: 1 μm (a-f), 1 μm.

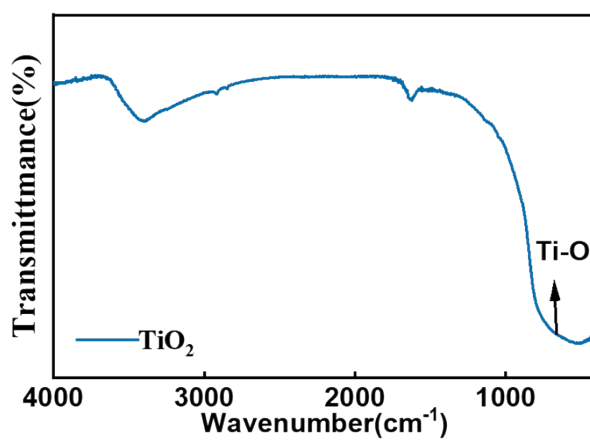

**Fig.S6.** FT-IR spectra of TiO<sub>2</sub>.

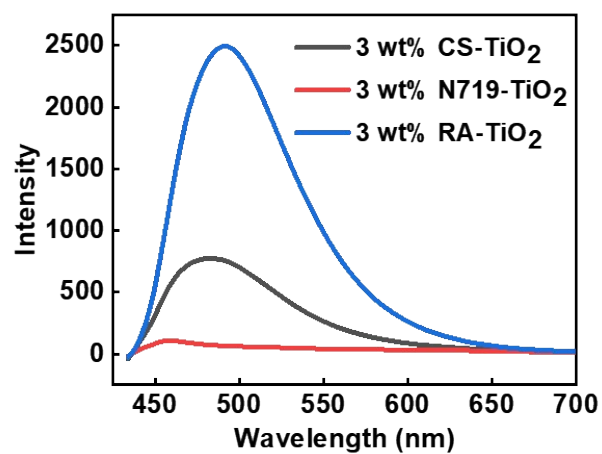

**Fig.S7.** FL spectra of PMMA fibers sensitized by different dyes with  $\text{TiO}_2$ .

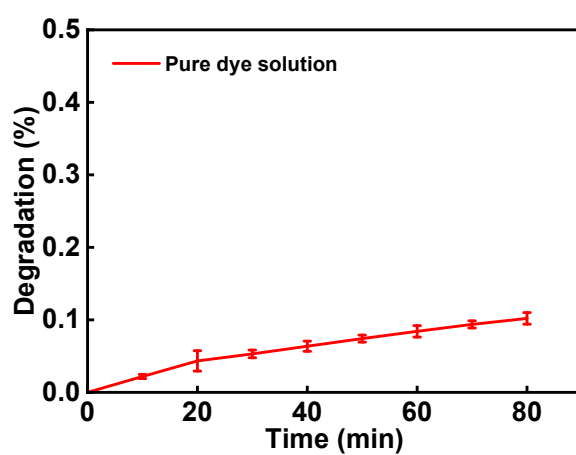

**Fig.S8.** Self degradation efficiency of Acid Red 359 200% pure dye solution under xenon lamp irradiation
